# Supplementary material for: Comparative Transcriptome Analysis of Penicillium citrinum Cultured with Different Carbon Sources Identifies Genes Involved in Citrinin Biosynthesis
Source: MDPI journal article supplement (doi:10.3390/toxins9020069), 2017-02-21
Supplement: s1 [file s1]

# Supplementary Materials: Comparative transcriptome analysis of *Penicillium citrinum* cultured with different carbon sources identifies genes involved in citrinin biosynthesis

Taotao Li, Guoxiang Jiang, Hongxia Qu, Yong Wang, Yehui Xiong, Qijie Jian, Yu Wu, Xuewu Duan, Xiangrong Zhu, Wenzhong Hu, Jiasheng Wang, Liang Gong and Yueming Jiang

**Table S1.** Summary of RNA-Seq data. S-samples were grown with sucrose and the G-Samples were grown with glucose as sole carbon source.

| Sample name | Total reads | Total nucleotide (nt) | Q <sub>≥</sub> 20 | Adapter | Low quality |
|-------------|-------------|-----------------------|-------------------|---------|-------------|
| S1          | 41024262    | 6153639300            | 95.76%            | 10.27%  | 0.02%       |
| S2          | 40904432    | 6135664800            | 95.24%            | 7.22%   | 0.02%       |
| G1          | 40267398    | 6040109700            | 95.95%            | 8.66%   | 0.02%       |
| G2          | 41064036    | 6159605400            | 95.68%            | 10.18%  | 0.02%       |

**Table S2.** Results of *de novo* assembly.

| Unigene | N50  | Average length | Total assembled bases |
|---------|------|----------------|-----------------------|
| 25491   | 3889 | 2048           | 52211935              |

**Table S3.** The primer sequences of 49 unigenes for qRT-PCR in this study.

| Gene ID            | Sequence of primer (5' to 3')                                        |
|--------------------|----------------------------------------------------------------------|
| Unigene4605_All    | For: ACTCATCTCTCGCACGCTGGATGT<br>Rev: TCTCTTCTCAGCCGCCAACTTCAA       |
| Unigene5443_All    | For: CTTGGTGGCGATGCGAATGATGG<br>Rev: CTTCTGAATAGCCTCTTCCTCCGTCTT     |
| Unigene4470_All    | For: AATGCTGGCGATGCTGGTATGGA<br>Rev: GTGGCTGCTGGTGAAGTAGACGAT        |
| Unigene1201_All    | For: ATCTGATCGGTCGCATCCGTCTG<br>Rev: ACCTATAAGCCTCCTCGTCCTTCGT       |
| Unigene3306_All    | For: GGAACCTGGAACCTTCATCACGCATT<br>Rev: ACGGACGCAGGAAGCCCTTTATC      |
| CL2002.Contig3_All | For: CGCTTCCGCTATGATCCGACCAT<br>CAACAAGACCTATTTCAACGCCGAGAT          |
| CL2002.Contig2_All | For: CGCTTCCGCTATGATCCGACCAT<br>Rev: CAACAAGACCTATTTCAACGCCGAGAT     |
| CL3211.Contig2_All | For: ACCTGACGATGTAATTATCCGACTCA<br>Rev: GTCTCCTTATCATTCCAGCACATAGCA  |
| Unigene3258_All    | For: GAGATGGTGTCCGTGATTGCTGAG<br>Rev: GTATTGTTCTGATGCCATAGTCACTCCTC  |
| CL1938.Contig2_All | For: GTCAAATCCAGCCTGAGGAAAGTGT<br>TGGTCGCCATTATGAGTCAACAACAAT        |
| CL1093.Contig2_All | For: TCCAAGTATCAAGTGGTCTAGGCTCAT<br>Rev: CTTGCGAATCTCGCTCTCCTTCAAG   |
| CL2531.Contig1_All | For: AACAAATCGCTTACGCCTGCTTACA<br>Rev: GAGCCTTGAGCACTATATCAACCACTT   |
| Unigene950_All     | For: GACTCGGTGGCTGGAGATGGAT<br>Rev: GTGGTGAGACAGAAGAAGATTAGAGCAA     |
| Unigene401_All     | For: ATCTCCAACCTTGCCATTGCCATCA<br>Rev: CTCTCCGTCCGAGCATCCAGAA        |
| Unigene6956_All    | For: CCTGATGACGAGTTCAAGCCTGAC<br>Rev: GATCACCATTGCCGCTGTAGACAT       |
| Unigene1095_All    | For: AGACAGCCAGAAGAGTGAAGGAGAG<br>CGACATCAGTTGACTTGGACCGTATT         |
| CL1869.Contig6_All | For: TTCAACGGCAGTCCTATCATCATCATT<br>Rev: GCCTCCATAATTAACACTGTCCTTCCA |
| Unigene3849_All    | For: GGACGAACCACACCGCATTCTATT<br>Rev: TTCCACGCCTCAAGAGCTTCCT         |
| Unigene5620_All    | For: CCGTGCGAATTACCATAGCCGATT<br>Rev: CGAGACTCAATCCTACTCCAAGACCT     |
| Unigene8542_All    | For: GGAACCTCCGCACTCTGATGTATCG<br>Rev: CTGCTGGACACTGTGGATCATTACG     |
| CL2339.Contig4_All | For: AGACTGCTGAGGAGGCTCTTGAC<br>Rev: GTAGAACTCGCTGGAGGCAACATC        |

---

|                     |                                                                      |
|---------------------|----------------------------------------------------------------------|
| Unigene548_All      | For: CCGCCGTGCCGATTATCATCTC<br>Rev: CCAGCCTCAACACAGAGCATCTTC         |
| Unigene6764_All     | For: ATTCTTCGGCTTCATTGAGTCCTTCC<br>Rev: CCAGCAGATAAGAGAGCGTAGAGAGTA  |
| Unigene2457_All     | For: GACCGCTGATCTGATTGATTCACCTT<br>Rev: TCGTTAGGCTGATGTGTACCATTGC    |
| CL2164.Contig11_All | For: CGACACCGACCGCAAGTTCTAC<br>Rev: ACCATCACCGCCCAGAGTAGTC           |
| Unigene11940_All    | For: GGCTGAGTTATATGGCGAAGATGGTATT<br>Rev: TTAGGCAAGGCATCTGGTAGAGGAA  |
| Unigene5219_All     | For: CTCGTTGGTAGTGTCAAGGATGTTAAGT<br>Rev: GCTGCTTCAGTTCGCTGCTGTA     |
| CL1796.Contig2_All  | For: TCAACACGCTATCATTCTCGCTAAG<br>Rev: GCCTTCCCATTGCCATTGTCATTTC     |
| CL1031.Contig3_All  | For: TCGGTTGGACTCTACAGCAAGGAT<br>Rev: CGGTGGTGAAGTATCTGAACGGATG      |
| Unigene8156_All     | For: GAACAGGAACTCCCGTCGGTGA<br>Rev: CTGAAGGGTGCTTGCCAGTCTTT          |
| CL1031.Contig5_All  | For: GATGCGGCTTTTCACCTCACTACTT<br>Rev: TTGTCTGACCAGCTCCATTGATGC      |
| CL348.Contig2_All   | For: GGAACCTACAACAGCACTCACCAGAAC<br>Rev: CCAATCCACCAACACCAATGATACCAA |
| Unigene125_All      | For: AAGCACACCATCTACAAGCAGTTCAA<br>Rev: TTCACGAGCATAGCCAAGGAGGA      |
| CL1559.Contig1_All  | TCGGCACACCTGCGTACTTCAATA<br>CGGTAGCAATGACATCAACATCCACAG              |
| Unigene13097_All    | CAGGAGACTCGTGCCAATCAGACA<br>AGATGGGTGGTACACTTGCGTCAG                 |
| Unigene2872_All     | GGCACTAGGCGGACCACTTGAT<br>GCCAATCTTCATCTTCCAATCCAGCTC                |
| Unigene4460_All     | CACCGTTGCTTCTAAACTCACCGAAA<br>TTCCATTGACCAGTGTAGAGCCTCC              |
| Unigene5036_All     | CCGTGAGCACTTGTTCCATGATGAC<br>GCAGAAACCTGGGTAGGAGGAATAGAC             |
| Unigene5396_All     | TCTTGTTGGCTGCTGGATCTTCTGT<br>GAGGAGGTCAGTTGCGTAGTCAGTT               |
| CL1213.Contig1_All  | CGGCTTCTGAAGTCGTTGGGATTG<br>GCTCTGAGGTGAGTATCATCATCGGAAT             |
| CL1213.Contig2_All  | CCCAACGATGAGCGAGAGCAAGA<br>CCCATATCCCTGTACCAGTCCCTAAATC              |
| CL1213.Contig6_All  | TCAGCATACAATGGCTCGATAAGCAATG<br>TCTCGCTCATCGTTGGGCAAGAA              |
| Unigene2855_All     | GAGCCAGCGGTCATCACCAAGA<br>GCAAGTAGCCCAACCCTCGTGTA                    |

| CL2103.Contig1_All | GCGAAGTCGAGGAGAATGTAGAGTATGT<br>GCAATAATGTCTTCACCGCTGTCACTAT        |
|--------------------|---------------------------------------------------------------------|
| CL2103.Contig5_All | TTCTGGACGAGTTGATGGTACTGTTGT<br>CCTGAGAGATTGAATTTGGCGAGTGTG          |
| CL2103.Contig6_All | ACCTAGCTTCTGGACGAGTGAATACG<br>TGAGAGATTGAATTTGGCGAGTGTGAC           |
| CL1659.Contig3_All | CTGAGCAAGACAGCAAGACTGAAGATG<br>CTATGCGACGAAGGTTCTCCAGAAGA           |
| Unigene7245_All    | ACGTGCAACTCAAGGACTCTCAGC<br>ATTTGGCCGTGAAGGACGACCA                  |
| CL1659.Contig1_All | GGCGTTGATAAGCGGTCGTATGC<br>CATCCTTAGCGGTAGGCGAGTCAG                 |
| CL2661.Contig1_All | For: TCCGTGAGATCCGTCGCTACCA<br>Rev: ACTCCTGAAGAGCACCGATGGC          |
| Gene ID            | Sequence of primer (5' to 3')                                       |
| Unigene4605_All    | For: ACTCATCTCTCGCACGCTGGATGT<br>Rev: TCTCTTCTCAGCCGCCAACTTCAA      |
| Unigene5443_All    | For: CTTGGTGGCGATGCGAATGATGG<br>Rev: CTTCTGAATAGCCTCTTCCTCCGTCTT    |
| Unigene4470_All    | For: AATGCTGGCGATGCTGGTATGGA<br>Rev: GTGGCTGCTGGTGAAGTAGACGAT       |
| Unigene1201_All    | For: ATCTGATCGGTCGCATCCGTCTG<br>Rev: ACCTATAAGCCTCCTCGTCCTTCGT      |
| Unigene3306_All    | For: GGAACCTGGAACCTTCATCACGCATT<br>Rev: ACGGACGCAGGAAGCCCTTTATC     |
| CL2002.Contig3_All | For: CGCTTCCGCTATGATCCGACCAT<br>CAACAAGACCTATTTCAACGCCGAGAT         |
| CL2002.Contig2_All | For: CGCTTCCGCTATGATCCGACCAT<br>Rev: CAACAAGACCTATTTCAACGCCGAGAT    |
| CL3211.Contig2_All | For: ACCTGACGATGTACTTATCCGACTCA<br>Rev: GTCTCCTTATCATTCAGCACATAGCA  |
| Unigene3258_All    | For: GAGATGGTGTCCGTGATTGCTGAG<br>Rev: GTATTGTTCTGATGCCATAGTCACTCCTC |
| CL1938.Contig2_All | For: GTCAAATCCAGCCTGAGGAAAGTGT<br>TGGTCGCCATTATGAGTCAACAACAAT       |
| CL1093.Contig2_All | For: TCCAAGTATCAAGTGGTCTAGGCTCAT<br>Rev: CTTGGAATCTCGCTCTCCTTCAAG   |
| CL2531.Contig1_All | For: AACAAATCGCTTACGCCTGCTTACA<br>Rev: GAGCCTTGAGCACTATATCAACCACTT  |
| Unigene950_All     | For: GACTCGGTGGCTGGAGATGGAT<br>Rev: GTGGTGAGACAGAAGAAGATTAGAGCAA    |
| Unigene401_All     | For: ATCTCCAACCTTGCCATTGCCATCA<br>Rev: CTCTCCGTCCGAGCATCCAGAA       |
| Unigene6956_All    | For: CCTGATGACGAGTTCAAGCCTGAC<br>Rev: GATCACCATTGCCGCTGTAGACAT      |

|                     |                                                                       |
|---------------------|-----------------------------------------------------------------------|
| Unigene1095_All     | For: AGACAGCCAGAAGAGTGAAGGAGAG<br>CGACATCAGTTGACTTGGACCGTATT          |
| CL1869.Contig6_All  | For: TTCAACGGCAGTCCTATCATCATCATT<br>Rev: GCCTCCATAATTAACACTGTCCTTCCA  |
| Unigene3849_All     | For: GGACGAACCACACCGCATTCTATT<br>Rev: TTCCACGCCTCAAGAGCTTCCT          |
| Unigene5620_All     | For: CCGTGCGAATTACCATAGCCGATT<br>Rev: CGAGACTCAATCCTACTCCAAGACCT      |
| Unigene8542_All     | For: GGAAC TTCCGCACTCTGATGTATCG<br>Rev: CTGCTGGACACTGTGGATCATTACG     |
| CL2339.Contig4_All  | For: AGACTGCTGAGGAGGCTCTTGAC<br>Rev: GTAGAACTCGCTGGAGGCAACATC         |
| Unigene548_All      | For: CCGCCGTGCCGATTATCATCTC<br>Rev: CCAGCCTCAACACAGAGCATCTTC          |
| Unigene6764_All     | For: ATTCTTCGGCTTCATTGAGTCCTTCC<br>Rev: CCAGCAGATAAGAGAGCGTAGAGAGTA   |
| Unigene2457_All     | For: GACCGCTGATCTGATTGATTCACCTT<br>Rev: TCGTTAGGCTGATGTGTACCATTGC     |
| CL2164.Contig11_All | For: CGACACCGACCGCAAGTTCTAC<br>Rev: ACCATCACCGCCCAGAGTAGTC            |
| Unigene11940_All    | For: GGCTGAGTTATATGGCGAAGATGGTATT<br>Rev: TTAGGCAAGGCATCTGGTAGAGGAA   |
| Unigene5219_All     | For: CTCGTTGGTAGTGTCAAGGATGTAAAGT<br>Rev: GCTGCTTCAGTTCGCTGCTGTA      |
| CL1796.Contig2_All  | For: TCAACACGCTATCATTCTCGCTAAG<br>Rev: GCCTTCCCATTGCCATTGTCATTTC      |
| CL1031.Contig3_All  | For: TCGGTTGGACTCTACAGCAAGGAT<br>Rev: CGGTGGTGAAGTATCTGAACGGATG       |
| Unigene8156_All     | For: GAACAGGAACTCCCGTCGGTGA<br>Rev: CTGAAGGGTGCTTGCCAGTCTTT           |
| CL1031.Contig5_All  | For: GATGCGGCTTTACCTCACTACTT<br>Rev: TTGTCTGACCAGCTCCATTGATGC         |
| CL348.Contig2_All   | For: GGAAC TTACAACAGCACTCACCAGAAC<br>Rev: CCAATCCACCAACACCAATGATACCAA |
| Unigene125_All      | For: AAGCACACCATCTACAAGCAGTTCAA<br>Rev: TTCACGAGCATAGCCAAGGAGGA       |
| CL1559.Contig1_All  | TCGGCACACCTGCGTACTTCAATA<br>CGGTAGCAATGACATCAACATCCACAG               |
| Unigene13097_All    | CAGGAGACTCGTGCCAATCAGACA<br>AGATGGGTGGTACACTTGCGTCAG                  |
| Unigene2872_All     | GGCACTAGGCGGACCACTTGAT<br>GCCAATCTTCATCTTCCAATCCAGCTC                 |
| Unigene4460_All     | CACCGTTGCTTCTAAACTCACCGAAA<br>TTCCATTGACCAGTGTAGAGCCTCC               |

|                    |                                                              |
|--------------------|--------------------------------------------------------------|
| Unigene5036_All    | CCGTGAGCACTTGTTCATGATGAC<br>GCAGAAACCTGGGTAGGAGGAATAGAC      |
| Unigene5396_All    | TCTTGTGGCTGCTGGATCTTCTGT<br>GAGGAGGTCAGTTGCGTAGTCAGTT        |
| CL1213.Contig1_All | CGGCTTCTGAAGTCGTTGGGATTG<br>GCTCTGAGGTGAGTATCATCATCGGAAT     |
| CL1213.Contig2_All | CCCAACGATGAGCGAGAGCAAGA<br>CCCATATCCCTGTACCAGTCCCTAAATC      |
| CL1213.Contig6_All | TCAGCATACAATGGCTCGATAAGCAATG<br>TCTCGCTCATCGTTGGGCAAGAA      |
| Unigene2855_All    | GAGCCAGCGGTCATCACCAAGA<br>GCAAGTAGCCCAACCCTCGTGTA            |
| CL2103.Contig1_All | GCGAAGTCGAGGAGAATGTAGAGTATGT<br>GCAATAATGTCTTCACCGCTGTCACTAT |
| CL2103.Contig5_All | TTCTGGACGAGTTGATGGTACTGTTGT<br>CCTGAGAGATTGAATTTGGCGAGTGTG   |
| CL2103.Contig6_All | ACCTAGCTTCTGGACGAGTGAATACG<br>TGAGAGATTGAATTTGGCGAGTGTGAC    |
| CL1659.Contig3_All | CTGAGCAAGACAGCAAGACTGAAGATG<br>CTATGCGACGAAGGTTCTCCAGAAGA    |
| Unigene7245_All    | ACGTGCAACTCAAGGACTCTCAGC<br>ATTGGCCGTGAAGGACGACCA            |
| CL1659.Contig1_All | GGCGTTGATAAGCGGTCGTATGC<br>CATCCTTAGCGGTAGGCGAGTCAG          |
| CL2661.Contig1_All | For: TCCGTGAGATCCGTCGCTACCA<br>Rev: ACTCCTGAAGAGCACCGATGGC   |

| Gene ID            | Sequence of primer (5' to 3')                                       |
|--------------------|---------------------------------------------------------------------|
| Unigene4605_All    | For: ACTCATTTCTCGCACGCTGGATGT<br>Rev: TCTCTTCTCAGCCGCCAACTTCAA      |
| Unigene5443_All    | For: CTTGGTGGCGATGCGAATGATGG<br>Rev: CTTCTGAATAGCCTCTTCCTCCGTCTT    |
| Unigene4470_All    | For: AATGCTGGCGATGCTGGTATGGA<br>Rev: GTGGCTGCTGGTGAAGTACGAT         |
| Unigene1201_All    | For: ATCTGATCGGTCGCATCCGTCTG<br>Rev: ACCTATAAGCCTCCTCGTCCTTCGT      |
| Unigene3306_All    | For: GGAACCTGGAACCTTCATCACGCATT<br>Rev: ACGGACGCAGGAAGCCCTTTATC     |
| CL2002.Contig3_All | For: CGCTTCCGCTATGATCCGACCAT<br>CAACAAGACCTATTTCAACGCCGAGAT         |
| CL2002.Contig2_All | For: CGCTTCCGCTATGATCCGACCAT<br>Rev: CAACAAGACCTATTTCAACGCCGAGAT    |
| CL3211.Contig2_All | For: ACCTGACGATGTAATTATCCGACTCA<br>Rev: GTCTCCTTATCATTCCAGCACATAGCA |
| Unigene3258_All    | For: GAGATGGTGTCCGTGATTGCTGAG<br>Rev: GTATTGTTCGTAGCCATAGTCACTCCTC  |

|                     |                                                                      |
|---------------------|----------------------------------------------------------------------|
| CL1938.Contig2_All  | For: GTCAAATCCAGCCTGAGGAAAGTGT<br>TGGTCGCCATTATGAGTCAACAACAAT        |
| CL1093.Contig2_All  | For: TCCAAGTATCAAGTGGTCTAGGCTCAT<br>Rev: CTTGGAATCTCGCTCTCCTTCAAG    |
| CL2531.Contig1_All  | For: AACAAATCGCTTACGCCTGCTTACA<br>Rev: GAGCCTTGAGCACTATATCAACCACTT   |
| Unigene950_All      | For: GACTCGGTGGCTGGAGATGGAT<br>Rev: GTGGTGAGACAGAAGAAGATTAGAGCAA     |
| Unigene401_All      | For: ATCTCCAACCTTGCCATTGCCATCA<br>Rev: CTCTCCGTCCGAGCATCCAGAA        |
| Unigene6956_All     | For: CCTGATGACGAGTTCAAGCCTGAC<br>Rev: GATCACCATTGCCGCTGTAGACAT       |
| Unigene1095_All     | For: AGACAGCCAGAAGAGTGAAGGAGAG<br>CGACATCAGTTGACTTGGACCGTATT         |
| CL1869.Contig6_All  | For: TTCAACGGCAGTCCTATCATCATCATT<br>Rev: GCCTCCATAATTAACACTGTCCTTCCA |
| Unigene3849_All     | For: GGACGAACCACACCGCATTCTATT<br>Rev: TTCCACGCCTCAAGAGCTTCCT         |
| Unigene5620_All     | For: CCGTGCGAATTACCATAGCCGATT<br>Rev: CGAGACTCAATCCTACTCCAAGACCT     |
| Unigene8542_All     | For: GGAACCTCCGCACTCTGATGTATCG<br>Rev: CTGCTGGACACTGTGGATCATTACG     |
| CL2339.Contig4_All  | For: AGACTGCTGAGGAGGCTCTTGAC<br>Rev: GTAGAACTCGCTGGAGGCAACATC        |
| Unigene548_All      | For: CCGCCGTGCCGATTATCATCTC<br>Rev: CCAGCCTCAACACAGAGCATCTTC         |
| Unigene6764_All     | For: ATTCTTCGGCTTCATTGAGTCCTTCC<br>Rev: CCAGCAGATAAGAGAGCGTAGAGAGTA  |
| Unigene2457_All     | For: GACCGCTGATCTGATTGATTACCTT<br>Rev: TCGTTAGGCTGATGTGTACCATTGC     |
| CL2164.Contig11_All | For: CGACACCGACCGCAAGTTCTAC<br>Rev: ACCATCACCGCCCAGAGTAGTC           |
| Unigene11940_All    | For: GGCTGAGTTATATGGCGAAGATGGTATT<br>Rev: TTAGGCAAGGCATCTGGTAGAGGAA  |
| Unigene5219_All     | For: CTCGTTGGTAGTGTCAAGGATGTTAAGT<br>Rev: GCTGCTTCAGTTCGCTGCTGTA     |
| CL1796.Contig2_All  | For: TCAACACGCTATCATTCTCGCTAAG<br>Rev: GCCTTCCCATTGCCATTGTCAATTTC    |
| CL1031.Contig3_All  | For: TCGGTTGGACTCTACAGCAAGGAT<br>Rev: CGGTGGTGAAGTATCTGAACGGATG      |
| Unigene8156_All     | For: GAACAGGAACTCCCGTCGGTGA<br>Rev: CTGAAGGGTGCTTGCCAGTCTTT          |
| CL1031.Contig5_All  | For: GATGCGGCTTTCACCTCACTACTT<br>Rev: TTGTCTGACCAGCTCCATTGATGC       |
| CL348.Contig2_All   | For: GGAACCTTACAACAGCACTACCAGAAC<br>Rev: CCAATCCACCAACACCAATGATACCAA |

|                    |                                                                 |
|--------------------|-----------------------------------------------------------------|
| Unigene125_All     | For: AAGCACACCATCTACAAGCAGTTCAA<br>Rev: TTCACGAGCATAGCCAAGGAGGA |
| CL1559.Contig1_All | TCGGCACACCTGCGTACTTCAATA<br>CGGTAGCAATGACATCAACATCCACAG         |
| Unigene13097_All   | CAGGAGACTCGTGCCAATCAGACA<br>AGATGGGTGGTACACTTGCGTCAG            |
| Unigene2872_All    | GGCACTAGGCGGACCACTTGAT<br>GCCAATCTTCATCTTCCAATCCAGCTC           |
| Unigene4460_All    | CACCGTTGCTTCTAAACTCACCGAAA<br>TTCCATTGACCAGTG TAGAGCCTCC        |
| Unigene5036_All    | CCGTGAGCACTTGTTCCATGATGAC<br>GCAGAAACCTGGGTAGGAGGAATAGAC        |
| Unigene5396_All    | TCTTGTTGGCTGCTGGATCTTCTGT<br>GAGGAGGTCAGTTGCGTAGTCAGTT          |
| CL1213.Contig1_All | CGGCTTCTGAAGTCGTTGGGATTG<br>GCTCTGAGGTGAGTATCATCATCGGAAT        |
| CL1213.Contig2_All | CCCAACGATGAGCGAGAGCAAGA<br>CCCATATCCCTGTACCAGTCCCTAAATC         |
| CL1213.Contig6_All | TCAGCATACAATGGCTCGATAAGCAATG<br>TCTCGCTCATCGTTGGGCAAGAA         |
| Unigene2855_All    | GAGCCAGCGGTCATCACCAAGA<br>GCAAGTAGCCCAACCCTCGTGTA               |
| CL2103.Contig1_All | GCGAAGTCGAGGAGAATGTAGAGTATGT<br>GCAATAATGTCTTCACCGCTGTCACTAT    |
| CL2103.Contig5_All | TTCTGGACGAGTTGATGGTACTGTTGT<br>CCTGAGAGATTGAATTTGGCGAGTGTG      |
| CL2103.Contig6_All | ACCTAGCTTCTGGACGAGTGAATACG<br>TGAGAGATTGAATTTGGCGAGTGTGAC       |
| CL1659.Contig3_All | CTGAGCAAGACAGCAAGACTGAAGATG<br>CTATGCGACGAAGGTTCTCCAGAAGA       |
| Unigene7245_All    | ACGTGCAACTCAAGGACTCTCAGC<br>ATTGGCCGTGAAGGACGACCA               |
| CL1659.Contig1_All | GGCGTTGATAAGCGGTCGTATGC<br>CATCCTTAGCGGTAGGCGAGTCAG             |
| CL2661.Contig1_All | For: TCCGTGAGATCCGTCGCTACCA<br>Rev: ACTCCTGAAGAGCACCGATGGC      |

---



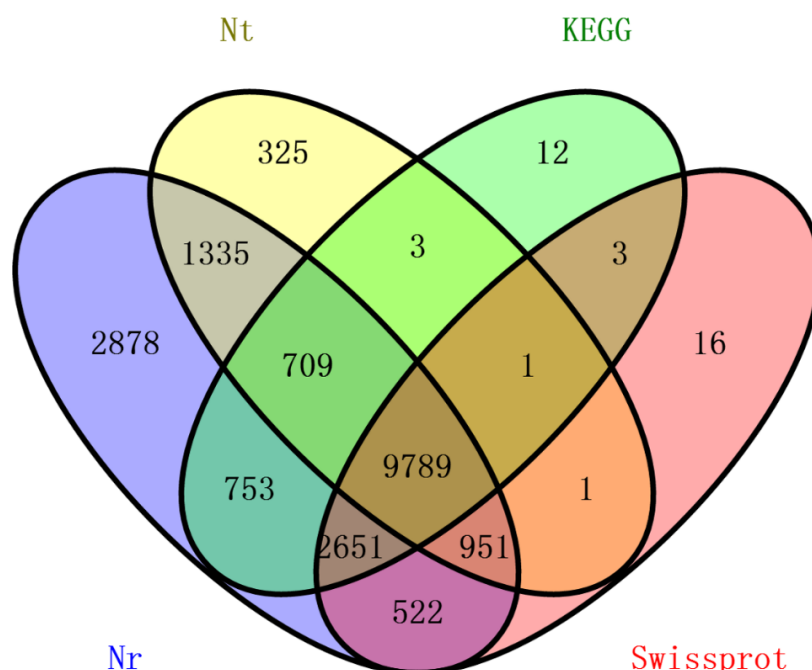

**Figure S1.** Number of the annotated genes against different databases.

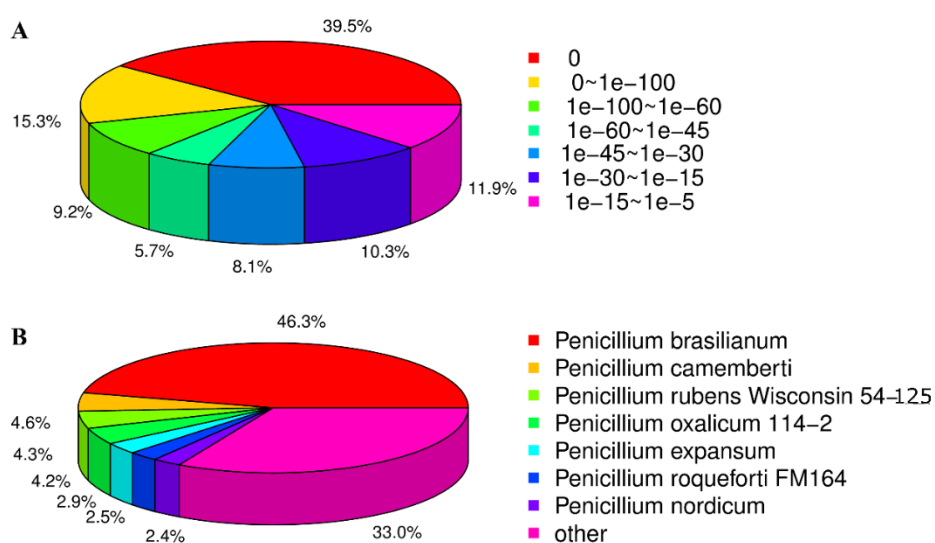

**Figure S2.** (A) E-value distribution of unigenes annotated in the nr database. (B) Species distribution of the first BLAST hits for each sequence with a cut-off E-value of 1.0E-5.

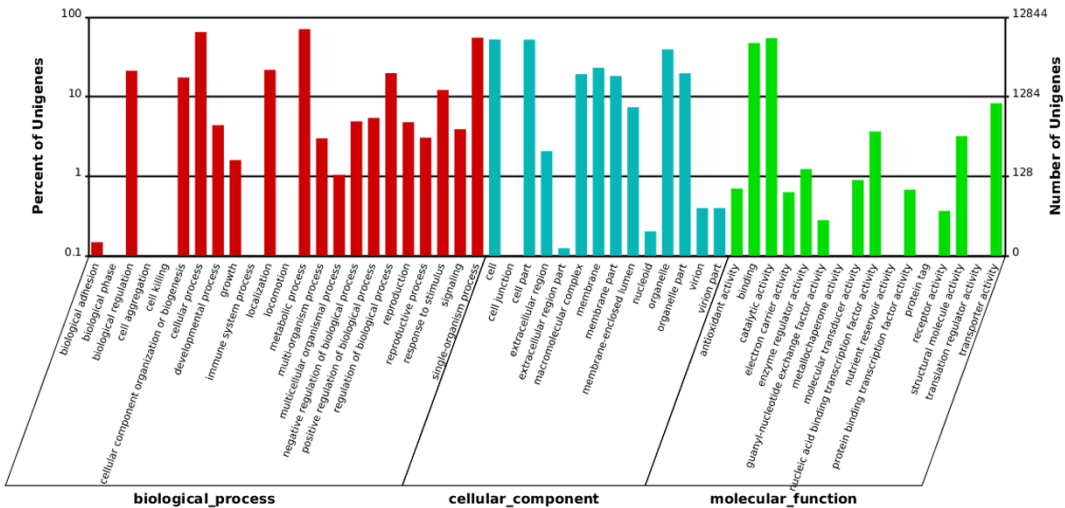

**Figure S3.** Gene Ontology (GO) classification of all unigenes. All unigenes were classified with respect to biological processes, molecular functions and cellular components.

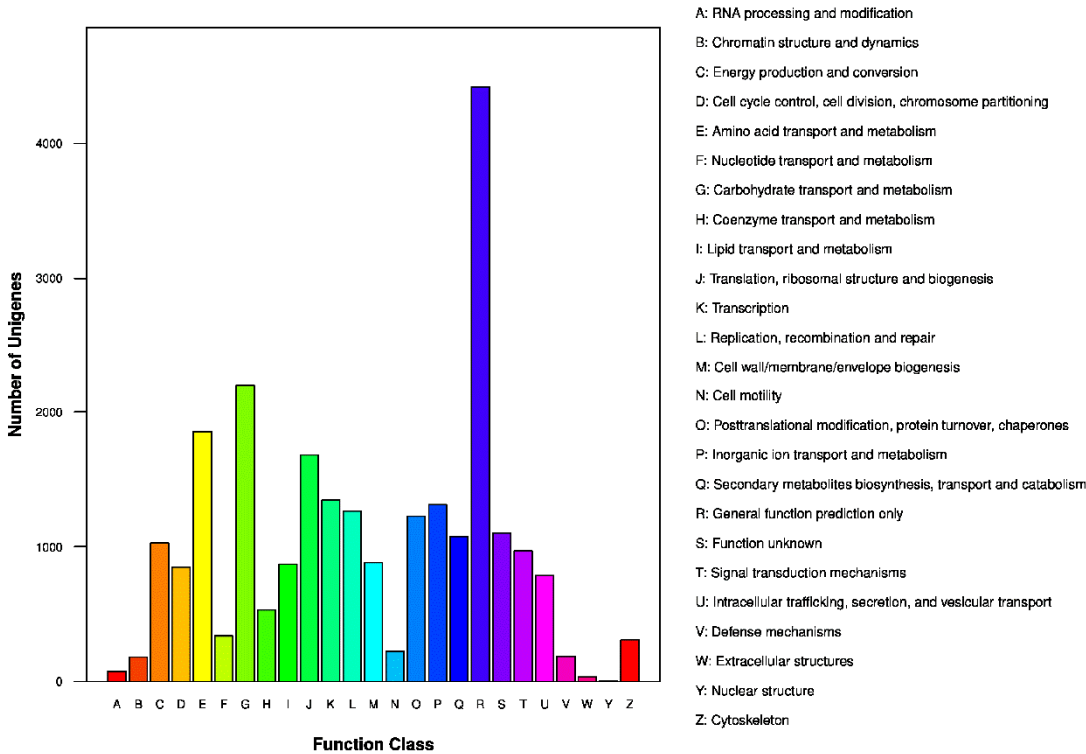

**Figure S4.** COG function classification of all unigenes.

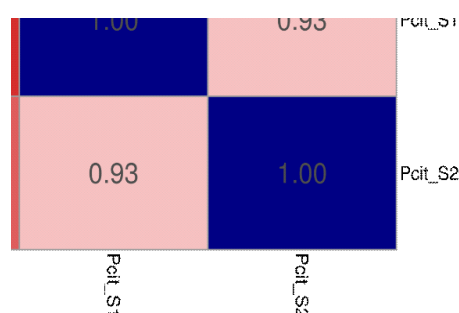

**Figure S5.** Spearman correlation analysis of the two replicates in each group. The vertical and horizontal axes represent the expression levels of all unigenes (log10 (FPKM)).

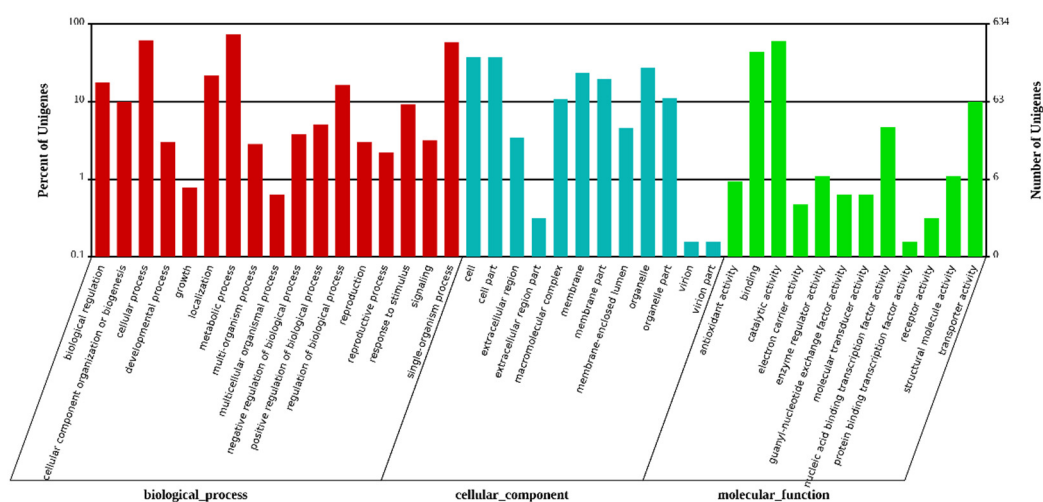

**Figure S6.** Cluster analysis of DEGs according to GO analysis. A total of 1085 DEGs were clustered using Blast2GO, and the analysis was performed with respect to biological processes, molecular functions and cellular components.

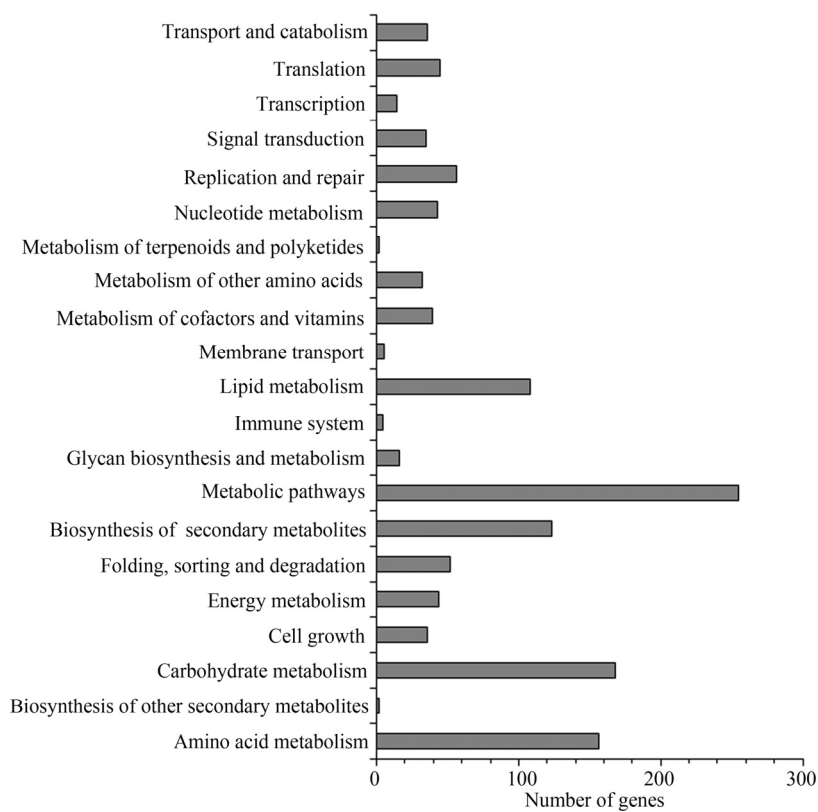

**Figure S7.** Cluster analysis of DEGs according to KEGG pathways. All those genes were classified according to the KEGG pathway database. Clusters of interest were selected for subsequent analysis.

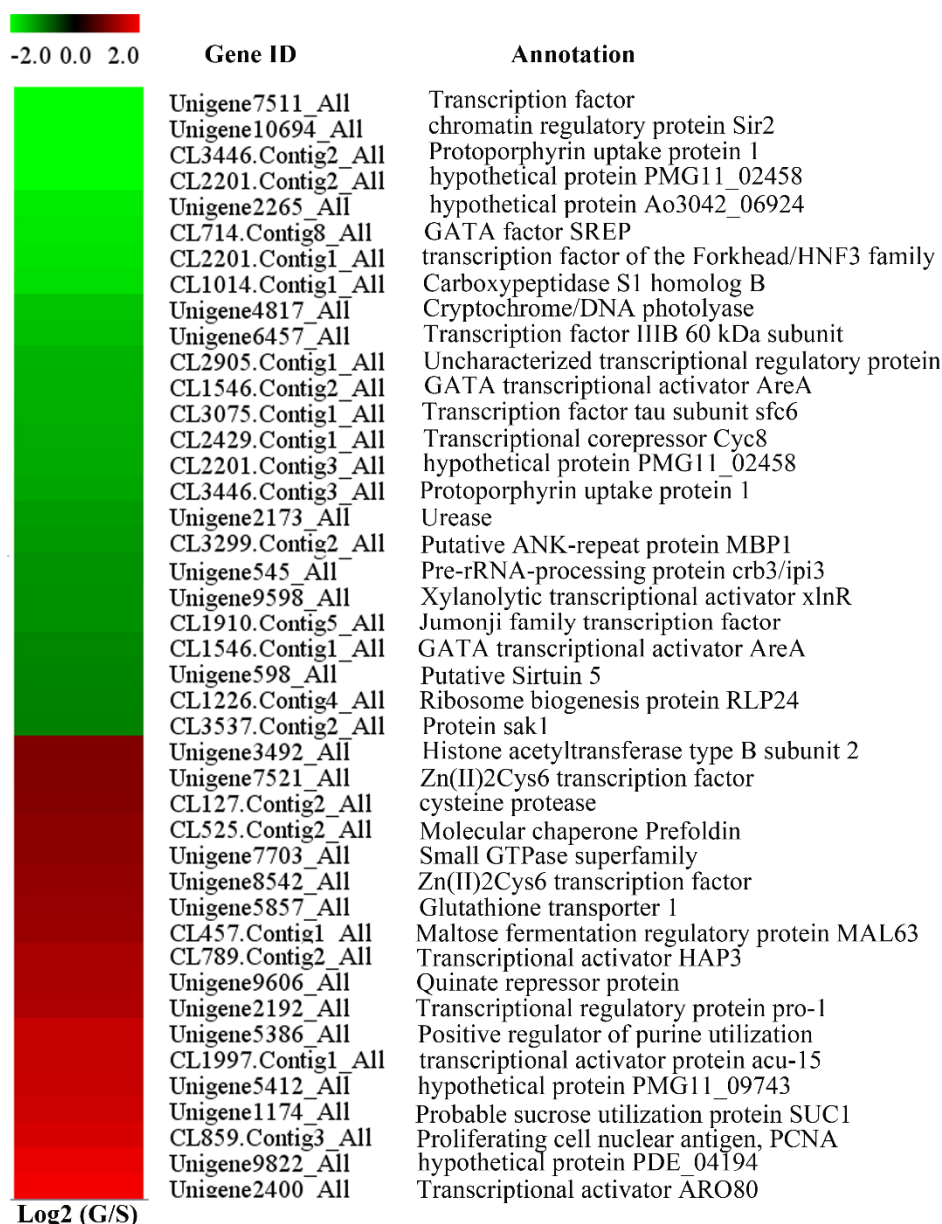

**Figure S8.** Expression profiles of DEGs involved in transcription factors.

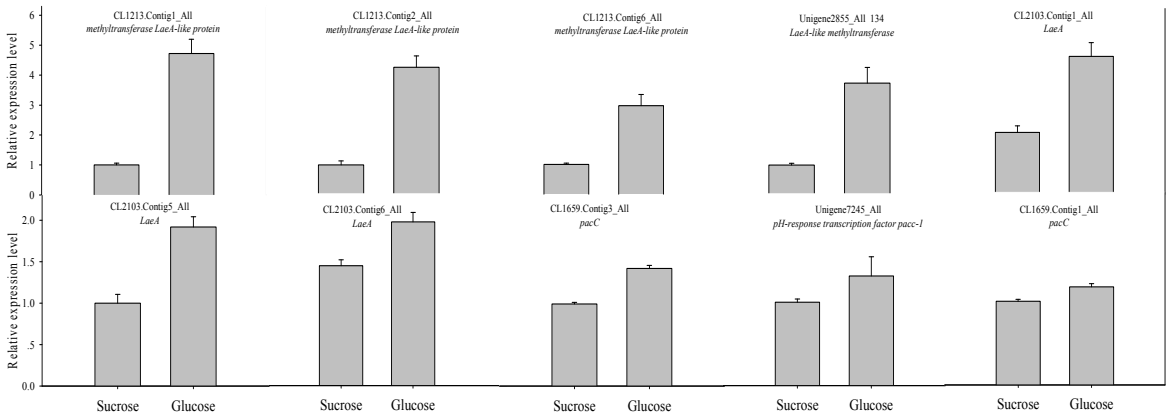

Figure S9. qRT-PCR analysis of expression levels of *LaeA* and *pacC* genes.

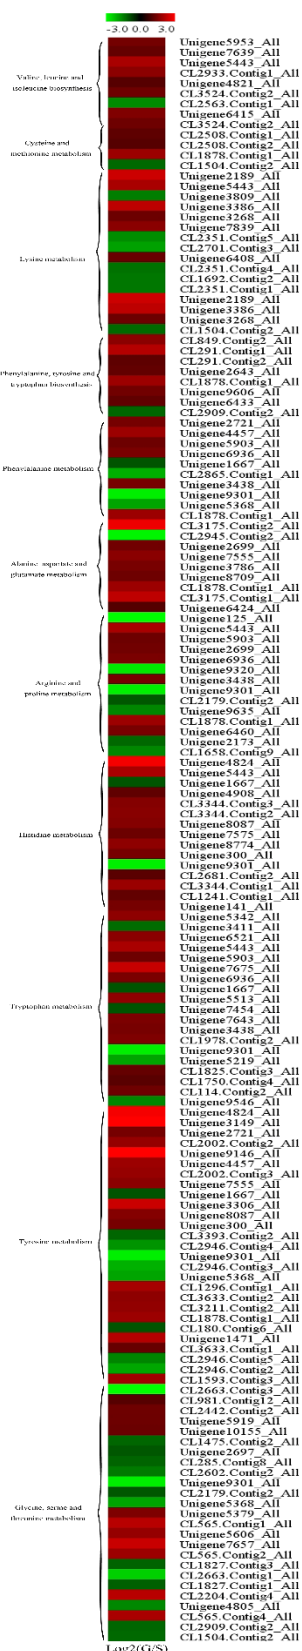

Figure S10. Expression profiles of DEGs involved in amino acids metabolism.
